# Supplementary material for: Influence of washing and quenching in profiling the metabolome of adherent mammalian cells: a case study with the metastatic breast cancer cell line MDA-MB-231
Source: Royal Society of Chemistry journal article supplement (doi:10.1039/c7an00207f), 2017-01-01
Supplement: c7an00207f1.pdf [file c7an00207f1.pdf]

## Influence of washing and quenching in profiling the metabolome of adherent mammalian cells: A case study with the metastatic breast cancer cell line MDA-MB-231

Rahul Vijay Kapoore,<sup>a</sup> Rachael Coyle,<sup>a,b</sup> Carolyn A Staton,<sup>b</sup> Nicola J Brown,<sup>b</sup> Seetharaman Vaidyanathan<sup>a</sup>

**Table S1** Assay parameters employed for the estimation of ATP content by luciferase bioluminescence assay in MDA-MB-231 cells. The amount of ATP determined was then normalised to protein content estimated by BCA microplate assay

| <b>Assay Parameters</b>                                                                              |                                                            |
|------------------------------------------------------------------------------------------------------|------------------------------------------------------------|
| Scale                                                                                                | 24 well plate (Corstar®)                                   |
| Seeding density                                                                                      | 50000 cells per well (cpw)                                 |
| Incubation                                                                                           | 36hr - 500µl full * RPMI 1640 (37°C + 5% CO <sub>2</sub> ) |
| Luciferase assay mix dilution factor                                                                 | 1:25 (FLASC Kit dilution buffer)                           |
| Amount of ATP releasing reagent (ARR)                                                                | 150 µl ATP Releasing Reagent, 100µl Luciferase             |
| ATP standard range (n=3) for preliminary experiments                                                 | 0, 0.2, 0.3, 0.44, 0.67, 1.0, 1.25, 1.5 (nM)               |
| ATP standard range (n=3) for other experiments.                                                      | 0, 0.44, 0.67, 1.0, 1.25, 1.5, 2 (nM)                      |
| Base line ATP MDA-231                                                                                | 1.2-1.3 nM                                                 |
| Additional test std. dilution (0.87nM) (n=3)                                                         | 6.5µl (1.5nM ATP) + 1493µl dH <sub>2</sub> O               |
| Protein quantification                                                                               | BCA Microplate assay (ab. 570nm) (Pierce)                  |
| <i>*Full = supplemented: 1% fungazone, 1% strep/P, 1% glutamine and 10% fetal bovine serum (FBS)</i> |                                                            |

**Table S2** Raw data and calculation part for estimation of nM amounts of free ATP produced in response to various washing solutions/steps. ATP levels were normalised to the protein levels. (Sample calculation part for Figure 3 a))

| Sample (MDA-MB-231) Figure 4.5 results |         |           |                    |            |                      |      |      |      |
|----------------------------------------|---------|-----------|--------------------|------------|----------------------|------|------|------|
| Samples Code                           | ATP RLU | ATP nmole | Protein Absorbance | Protein mg | ATP nmole/mg protein | Mean | SD   | SEM  |
| C                                      | 2812.00 | 0.79      | 1.37               | 1.19       | 0.66                 | 0.59 | 0.08 | 0.05 |
|                                        | 2205.00 | 0.60      | 1.13               | 1.00       | 0.60                 |      |      |      |
|                                        | 2213.00 | 0.61      | 1.39               | 1.20       | 0.50                 |      |      |      |
| PB1                                    | 2299.00 | 0.63      | 1.14               | 1.01       | 0.63                 | 0.74 | 0.14 | 0.08 |
|                                        | 2951.00 | 0.83      | 1.03               | 0.93       | 0.90                 |      |      |      |
|                                        | 2429.00 | 0.67      | 1.09               | 0.97       | 0.69                 |      |      |      |
| PB2                                    | 2729.00 | 0.76      | 0.84               | 0.77       | 0.99                 | 0.93 | 0.09 | 0.05 |
|                                        | 2380.00 | 0.66      | 0.88               | 0.80       | 0.83                 |      |      |      |
|                                        | 2788.00 | 0.78      | 0.88               | 0.80       | 0.98                 |      |      |      |
| W1                                     | 3354.00 | 0.95      | 1.00               | 0.90       | 1.06                 | 1.03 | 0.06 | 0.04 |
|                                        | 3012.00 | 0.85      | 0.98               | 0.88       | 0.96                 |      |      |      |
|                                        | 3368.00 | 0.95      | 0.98               | 0.88       | 1.08                 |      |      |      |
| W2                                     | 5012.00 | 1.45      | 1.03               | 0.92       | 1.57                 | 1.51 | 0.05 | 0.03 |
|                                        | 4218.00 | 1.21      | 0.91               | 0.83       | 1.46                 |      |      |      |
|                                        | 4588.00 | 1.32      | 0.97               | 0.88       | 1.50                 |      |      |      |

Initially the ATP standard curve and BCA standard curves were generated. Later, the nM amounts of free ATP produced in response to various washing steps/solutions were normalised to the protein levels as detailed below.

Concentration of free ATP (nM) in response to each treatment was calculated using equation:

$$y = 0.0003x - 0.571$$

Concentration of protein (mg) in response to each treatment was calculated using equation:

$$y = -0.0934x^2 + 1.0069x - 0.0143$$

The nM amounts of free ATP produced in response to various washing solutions/steps were normalised to the protein levels within each whole-cell lysate, the results are summarised in figure 3a.

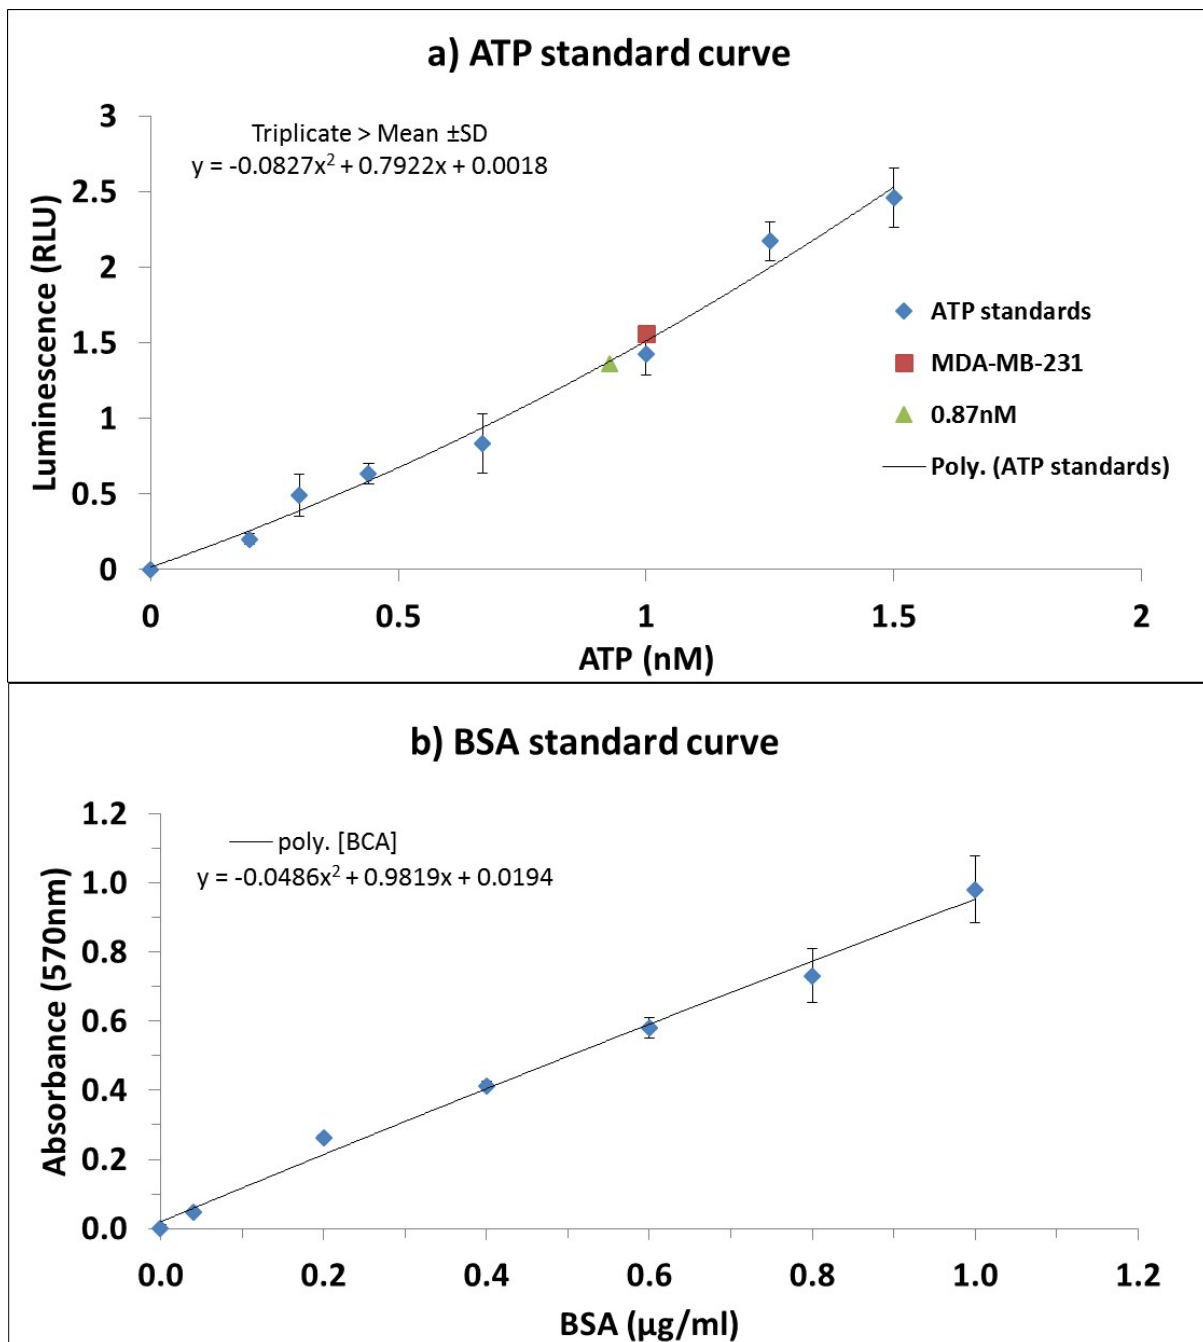

Fig. S1 Standard curves generated for both luciferase bioluminescence ATP assay (a) and BCA protein assay (b) using mean values of ATP and protein content obtained with set of standard solutions (n=3).

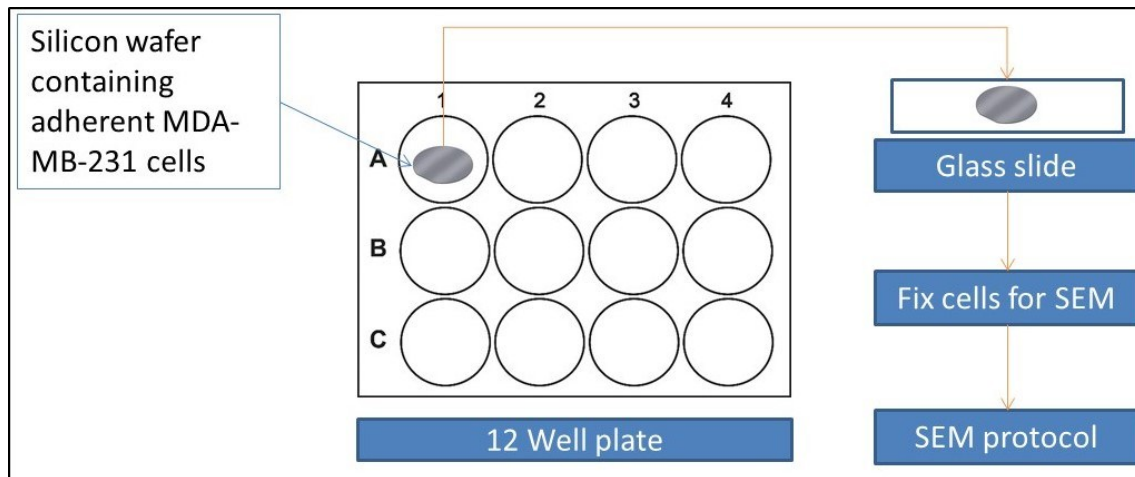

**Fig. S2** Schematic displaying workflow for SEM analysis of adherently growing cells. Adherent cells were grown on silicon wafers, which can be removed from the well plates by simply lifting the silicon wafers with forceps and cells along with the silicon wafers can be fixed for SEM analysis.

**Table S3** List of 112 identified and 28 unknown metabolites across all treatments in adherently growing metastatic cancer cell line MDA-MB-231. All the identified metabolites were classified based on their physicochemical properties into 11 different metabolite classes (class ID). **1** Organic acids (non-fatty) and derivatives; **2** Sugars/sugar alcohols and derivatives; **3** Amino acids and derivatives; **4** Nucleotides, nucleosides, nucleobases; **5** Fatty acids/fatty alcohols and derivatives; **6** Biogenic amines/polyamine; **7** Phosphates; **8** Alkanes; **9** Alcohols (others); **10** Ketones and ethers and **11** Others.

| <i>Met ID</i> | <i>Corrected Met ID's</i>    | <i>Class ID</i> |
|---------------|------------------------------|-----------------|
| 1             | 2-Piperidinecarboxylic acid  | 1               |
| 2             | 3-Methyl-2-oxopentanoic-acid | 1               |
| 3             | Adipic acid                  | 1               |
| 4             | Butanoic acid                | 1               |
| 5             | Citric acid                  | 1               |
| 6             | Erythronic acid              | 1               |
| 7             | Fumaric acid                 | 1               |
| 8             | Glutaric acid                | 1               |
| 9             | Glyoxylic acid               | 1               |
| 10            | Gulonic acid                 | 1               |
| 11            | Iminodiacetic acid           | 1               |
| 12            | Indole-3-acetic acid         | 1               |
| 13            | Lactic acid                  | 1               |
| 14            | Malic acid                   | 1               |
| 15            | Mandelic acid                | 1               |
| 16            | Oxalic acid                  | 1               |
| 17            | Pyruvic acid                 | 1               |
| 18            | Threonic acid                | 1               |
| 19            | Allose                       | 2               |
| 20            | Arabitol                     | 2               |
| 21            | Erythritol                   | 2               |
| 22            | Fructose                     | 2               |
| 23            | Galactitol                   | 2               |
| 24            | Galactose                    | 2               |
| 25            | Gentiobiose                  | 2               |
| 26            | Glucose                      | 2               |
| 27            | Inositol                     | 2               |
| 28            | Kestose                      | 2               |
| 29            | Laminaribiose                | 2               |
| 30            | Lyxose                       | 2               |
| 31            | Mannitol                     | 2               |
| 32            | Mannose                      | 2               |
| 33            | Psicose                      | 2               |
| 34            | Ribitol                      | 2               |
| 35            | Ribose                       | 2               |
| 36            | similar to Fructose Derivate | 2               |
| 37            | similar to Inositol          | 2               |
| 38            | Sorbitol                     | 2               |
| 39            | Sorbose                      | 2               |
| 40            | Sucrose                      | 2               |
| 41            | Tagatose                     | 2               |
| 42            | Threitol                     | 2               |
| 43            | Threose                      | 2               |
| 44            | Xylitol                      | 2               |
| 45            | Xylose                       | 2               |
| 46            | Alanine                      | 3               |
| 47            | Aminomalonic acid            | 3               |
| 48            | Asparagine                   | 3               |
| 49            | Aspartic acid                | 3               |
| 50            | Cysteine                     | 3               |
| 51            | Glutamic acid                | 3               |
| 52            | Glutamine                    | 3               |
| 53            | Glycine                      | 3               |
| 54            | Homoserine                   | 3               |
| 55            | Isoleucine                   | 3               |
| 56            | Leucine                      | 3               |
| 57            | Lysine                       | 3               |
| 58            | Methionine                   | 3               |
| 59            | N-Carboxyglycine             | 3               |
| 60            | Norleucine                   | 3               |
| 61            | Ornithine                    | 3               |
| 62            | Phenylalanine                | 3               |
| 63            | Proline                      | 3               |
| 64            | Prolyl-glycine               | 3               |
| 65            | Pyroglutamic acid            | 3               |
| 66            | Serine                       | 3               |
| 67            | Threonine                    | 3               |
| 68            | Tryptophan                   | 3               |
| 69            | Tyrosine                     | 3               |
| 70            | Valine                       | 3               |
| 71            | Nicotinamide                 | 4               |
| 72            | Purine                       | 4               |
| 73            | Pyridoxamine                 | 4               |
| 74            | Cholesterol                  | 5               |
| 75            | Cholesterol-5beta            | 5               |
| 76            | Dodecanoic acid              | 5               |
| 77            | Dodecanol                    | 5               |
| 78            | Eicosan-1-ol                 | 5               |
| 79            | Eicosatetraenoic acid        | 5               |
| 80            | Heptadecan-1-ol              | 5               |
| 81            | Hexadecanoic acid            | 5               |
| 82            | Isocaproic acid              | 5               |
| 83            | Isocitric acid               | 5               |
| 84            | Octadecan-1-ol               | 5               |
| 85            | Octadecanoic acid            | 5               |
| 86            | Octadecenoic acid            | 5               |
| 87            | Pantothenic acid             | 5               |

|     |                                 |    |
|-----|---------------------------------|----|
| 88  | Pentadecan-1-ol                 | 5  |
| 89  | Pentadecanoic acid              | 5  |
| 90  | Tetradecanoic acid              | 5  |
| 91  | Tridecan-1-ol                   | 5  |
| 92  | Ethanolamine                    | 6  |
| 93  | Hypotaurine                     | 6  |
| 94  | Phenethylamine                  | 6  |
| 95  | Putrescine                      | 6  |
| 96  | Sphingosine                     | 6  |
| 97  | Triethanolamine                 | 6  |
| 98  | Urea                            | 6  |
| 99  | Ethanolaminephosphate           | 7  |
| 100 | Glycerol-3-phosphate            | 7  |
| 101 | Phosphoric acid                 | 7  |
| 102 | Pyrophosphate                   | 7  |
| 103 | Glycerol                        | 9  |
| 104 | Propane-1,2-diol                | 9  |
| 105 | Flavone                         | 10 |
| 106 | Glucosheptonic acid-1,4-lactone | 10 |
| 107 | Phenylacetaldehyde              | 10 |
| 108 | Creatinine                      | 11 |
| 109 | Maleimide                       | 11 |
| 110 | Quinazoline                     | 11 |
| 111 | similar to Diterbutylphenol     | 11 |
| 112 | Valero-1,5-lactam               | 11 |
| 113 | UK1                             | 11 |
| 114 | UK2                             | 11 |
| 115 | UK3                             | 11 |
| 116 | UK4                             | 11 |
| 117 | UK5                             | 11 |
| 118 | UK6                             | 11 |
| 119 | UK7                             | 11 |
| 120 | UK8                             | 11 |
| 121 | UK9                             | 11 |
| 122 | UK10                            | 11 |
| 123 | UK11                            | 11 |
| 124 | UK12                            | 11 |
| 125 | UK13                            | 11 |
| 126 | UK14                            | 11 |
| 127 | UK15                            | 11 |
| 128 | UK16                            | 11 |
| 129 | UK17                            | 11 |
| 130 | UK18                            | 11 |
| 131 | UK19                            | 11 |

|     |      |    |
|-----|------|----|
| 132 | UK20 | 11 |
| 133 | UK21 | 11 |
| 134 | UK22 | 11 |
| 135 | UK23 | 11 |
| 136 | UK24 | 11 |
| 137 | UK25 | 11 |
| 138 | UK26 | 11 |
| 139 | UK27 | 11 |
| 140 | UK28 | 11 |
